# Supplementary material for: Continent-wide survey reveals massive decline in African savannah elephants
Source: PubMed Central journal article supplement (PMC5012305; doi:10.7717/peerj.2354), 2016-08-31

Historical estimates for a single country

| Stratum | Year | Estimate | SE  |
|---------|------|----------|-----|
| A       | 1995 | 1,000    | 250 |
| A       | 2002 | 1,300    | 300 |
| A       | 2014 | 1,600    | 350 |
| B       | 2001 | 500      | 0   |
| B       | 2014 | 300      | 0   |

Generate 1,000 Monte Carlo samples based on each population estimate and SE.

| Stratum | Year | Monte Carlo Estimate |
|---------|------|----------------------|
| A       | 1995 | 1,039                |
| A       | 2002 | 1,602                |
| A       | 2014 | 1,738                |
| B       | 2001 | 500                  |
| B       | 2014 | 300                  |

Monte Carlo replicate 1

...

| Stratum | Year | Monte Carlo Estimate |
|---------|------|----------------------|
| A       | 1995 | 838                  |
| A       | 2002 | 768                  |
| A       | 2014 | 1291                 |
| B       | 2001 | 500                  |
| B       | 2014 | 300                  |

Monte Carlo replicate 500

...

| Stratum | Year | Monte Carlo Estimate |
|---------|------|----------------------|
| A       | 1995 | 797                  |
| A       | 2002 | 1,532                |
| A       | 2014 | 1605                 |
| B       | 2001 | 500                  |
| B       | 2014 | 300                  |

Monte Carlo replicate 1,000

GAM or Poisson regression to predict population size by year for each replicate.

| Year | Predicted Population | SE   |
|------|----------------------|------|
| 1995 | 1,437                | 233  |
| ...  | ....                 | .... |
| 2005 | 2,041                | 290  |
| ...  | ....                 | .... |
| 2014 | 2,110                | 339  |

...

| Year | Predicted Population | SE   |
|------|----------------------|------|
| 1995 | 1,168                | 227  |
| ...  | ....                 | .... |
| 2005 | 1,365                | 197  |
| ...  | ....                 | .... |
| 2014 | 1,571                | 313  |

...

| Year | Predicted Population | SE   |
|------|----------------------|------|
| 1995 | 1,083                | 185  |
| ...  | ....                 | .... |
| 2005 | 2,133                | 342  |
| ...  | ....                 | .... |
| 2014 | 1,940                | 313  |

Use Monte Carlo sampling to sample from the distribution of each prediction.

| Year | Predicted Population |
|------|----------------------|
| 1995 | 1,492                |
| ...  | ....                 |
| 2005 | 2,055                |
| ...  | ....                 |
| 2014 | 2,044                |

...

| Year | Predicted Population |
|------|----------------------|
| 1995 | 1,080                |
| ...  | ....                 |
| 2005 | 1,622                |
| ...  | ....                 |
| 2014 | 1,600                |

...

| Year | Predicted Population |
|------|----------------------|
| 1995 | 1,271                |
| ...  | ....                 |
| 2005 | 2,135                |
| ...  | ....                 |
| 2014 | 1,683                |

Combine estimates by year and make inferences based on distribution of values.

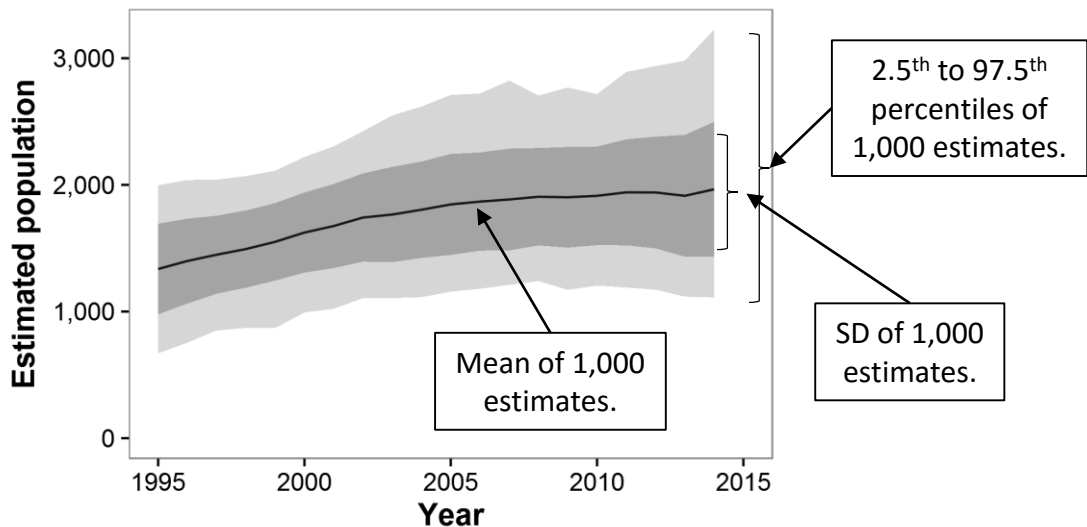

Supplement: peerj-04-2354-s003.pdf [file peerj-04-2354-s003.pdf]
