# Supplementary material for: Continent-wide survey reveals massive decline in African savannah elephants
Source: PeerJ. 2016 Aug 31;4:e2354. doi: 10.7717/peerj.2354 (PMC5012305; doi:10.7717/peerj.2354)
Supplement: Data S1 — Population estimates from GEC survey areas used to calculate country- and continent-wide statistics. [file peerj-04-2354-s015.xlsx]

## Sheet: Data
Country	Ecosystem	Stratum	Count type	Elephants	SE	Carcass 1	Carcass 2	Carcass 3	Carcass 4	All Carcasses	Survey area	Total area surveyed	Protected
Angola	Southeast Angola	ENTIRE ECOSYSTEM	sample	3395	797	81	313	632	426		43459	3386
Angola	Southeast Angola	Luiana NP	sample	1389	586	27	93	441	292		10464	1131.2	Yes
Angola	Southeast Angola	unprotected areas	sample	2006	540.197	54	220	191	134		32995	2254.8	No
Botswana	Northern Botswana	ENTIRE ECOSYSTEM	sample + total	129500	6378		123		9571		98307	12166
Botswana	Northern Botswana	Chobe FR	sample	3777	747		0		661		1296	182	Yes
Botswana	Northern Botswana	Chobe NP	sample	17212	1663		16		3427		21237	2278	Yes
Botswana	Northern Botswana	Kasane FR	sample	283	135		0		300		470	80	Yes
Botswana	Northern Botswana	Kazuma FR	total	130	0		0		6		195	195	Yes
Botswana	Northern Botswana	Mak. & Nxai Pan NPs	sample	2242	447		0		29		7674	822	Yes
Botswana	Northern Botswana	Moremi GR	sample	10027	665		0		179		4911	905	Yes
Botswana	Northern Botswana	Sibuyu FR	sample	2118	704		0		249		2470	198	Yes
Botswana	Northern Botswana	unprotected areas	sample + total	29355	4083	10.5	24.8	1102.1	1132.8		26015	3736.6	No
Botswana	Northern Botswana	WMAs	sample + total	64355	4148.28	17	54.6	0	2479.4		34039	3769.4	Yes
Botswana	Selebi-Phikwe	ENTIRE ECOSYSTEM	total	61	0						1974	1974
Botswana	Selebi-Phikwe	Selebi-Phikwe	total	61	0						1974	1974	No
Botswana	Tuli	ENTIRE ECOSYSTEM	total	890	0						1317.62	1317.62
Botswana	Tuli	farms	total	502	0						597.619	597.619	No
Botswana	Tuli	Northern Tuli GR	total	388	0						720	720	Yes
Cameroon	N. Soudanian Savannahs	ENTIRE ECOSYSTEM	sample	148	84	0	17	649	78.4		20598	1508.5
Cameroon	N. Soudanian Savannahs	Benoue SW/SE/NE	sample	0	0	0	0	25	0		4276	242.1	Yes
Cameroon	N. Soudanian Savannahs	Benoue NP	sample	0	0	0	0	0	19.4		2444	292.3	Yes
Cameroon	N. Soudanian Savannahs	Bouba East/West	sample	0	0	0	0	233	34		6094	363.1	Yes
Cameroon	N. Soudanian Savannahs	Bouba N'djida NP	sample	3	0	0	17	391	25		2347	282.1	Yes
Cameroon	N. Soudanian Savannahs	Faro NP (E+W)	sample	0	0		0			0	4087	242.2	Yes
Cameroon	N. Soudanian Savannahs	Faro SE	sample	140.3	80.5		0			0	1350	86.6	Yes
Chad	Binder Lere R	ENTIRE ECOSYSTEM	total	132	0	0	0	0	0		2142	2142
Chad	Binder Lere R	adjacent areas	total	0	0	0	0	0	0		792	792	No
Chad	Binder Lere R	Binder Lere Faunal R	total	132	0	0	0	0	0		1350	1350	Yes
Chad	Mayo Kebbi Est & Chari Baguirimi Elephant Area	ENTIRE ECOSYSTEM	total	168	0	0	0	53	0		3312	3312
Chad	Mayo Kebbi Est & Chari Baguirimi Elephant Area	Mayo Kebbi Est & Chari Baguirimi Elephant Area	total	168	0	0	0	53	0		3312	3312	No
Chad	N. Soudanian Savannahs	ENTIRE ECOSYSTEM	sample	0	0		0			0	1144	134.2
Chad	N. Soudanian Savannahs	Sena Oura NP	sample	0	0		0			0	1144	134.2	Yes
Chad	Zakouma NP	ENTIRE ECOSYSTEM	total	443	0	0	1	0	103		3201	3201
Chad	Zakouma NP	Zakouma NP	total	443	0	0	1	0	103		3201	3201	Yes
DR Congo	Garamba NP	ENTIRE ECOSYSTEM	sample + total	1924	148	0	0	28.1176	0		7699	4518
DR Congo	Garamba NP	north of park + other hunting R	sample	206	69.419	0	0	12.1176	0		4118	937	Yes
DR Congo	Garamba NP	south-middle of park + some hunting reserves	total	1718	0	0	0	16	0		3581	3581	Yes
DR Congo	Greater Virunga Landscape	ENTIRE ECOSYSTEM	sample	35	27						1650	188.6
DR Congo	Greater Virunga Landscape	Virunga NP	sample	35	27						1650	188.6	Yes
Ethiopia	Babile Elephant Sanctuary & SW Ethiopia	ENTIRE ECOSYSTEM	total	479	0	0	1	0	1		14691	14691
Ethiopia	Babile Elephant Sanctuary & SW Ethiopia	Babile Elephant Sanctuary	total	36	0	0	0	0	0		8450	8450	Yes
Ethiopia	Babile Elephant Sanctuary & SW Ethiopia	Chebera Chruchura NP	total	0	0	0	0	0	0		1215	1215	Yes
Ethiopia	Babile Elephant Sanctuary & SW Ethiopia	Mago NP	total	32	0	0	1	0	0		1880	1880	Yes
Ethiopia	Babile Elephant Sanctuary & SW Ethiopia	Omo NP	total	411	0	0	0	0	1		3146	3146	Yes
Ethiopia	NW Ethiopia	ENTIRE ECOSYSTEM	total	320	0	0	0	0	0		18099.6	18099.6
Ethiopia	NW Ethiopia	Alatash NP	total	0	0	0	0	0	0		2001	2001	Yes
Ethiopia	NW Ethiopia	Gambela NP	total	302	0	0	0	0	0		14611.2	14611.2	Yes
Ethiopia	NW Ethiopia	Kafta-Sherao NP	total	8	0	0	0	0	0		1487.4	1487.4	Yes
Kenya	Laikipia-Samburu	ENTIRE ECOSYSTEM	sample + total	8648	786	0	15	158	334		20008	5688
Kenya	Laikipia-Samburu	Buffalo Spr. & Samburu NR	total	507	0	0	0	4	9		355	355	Yes
Kenya	Laikipia-Samburu	Kerio Valley NR	total	309	0	0	0	0	2		122.34	122.34	Yes
Kenya	Laikipia-Samburu	Marsabit NR / Park	total	55	0	0	0	0	2		421	421	Yes
Kenya	Laikipia-Samburu	Meru & Bisnandi NP	total	659	0	0	0	2	15		1005	1005	Yes
Kenya	Laikipia-Samburu	Mwea NR	total	58	0	0	0	0	0		45	45	Yes
Kenya	Laikipia-Samburu	Nasalot NR	total	0	0	0	1	1	3		102.77	102.77	Yes
Kenya	Laikipia-Samburu	South Turkana NR	total	2	0	0	0	1	7		478.29	478.29	Yes
Kenya	Laikipia-Samburu	unprotected/community	sample + total	7058	786	0	14	150	296		17478.6	3158.6	No
Kenya	Lamu	ENTIRE ECOSYSTEM	total	60	0	0	0	5	11		15363	15363
Kenya	Lamu	Lamu	total	60	0	0	0	5	11		15363	15363	No
Kenya	Masai Mara	ENTIRE ECOSYSTEM	total	1428	0	0	8	0	109		8679.74	8679.74
Kenya	Masai Mara	Masai Mara R	total	876	0	0	0	0	19		1489.83	1489.83	Yes
Kenya	Masai Mara	unprotected	total	552	0	0	8	0	90		7189.91	7189.91	No
Kenya	Tsavo-Amboseli	ENTIRE ECOSYSTEM	sample	15823	1625.01	0	210	1432	1604		41660	2670
Kenya	Tsavo-Amboseli	Amboseli NP	sample	1146	588		0		30.5		400	65.6	Yes
Kenya	Tsavo-Amboseli	Tsavo East NP North	sample	1033	395		18		1126		9252.8	506.2	Yes
Kenya	Tsavo-Amboseli	Tsavo East NP South	sample	7970	1135		23		1127		7289.9	449.77	Yes
Kenya	Tsavo-Amboseli	Tsavo West NP	sample	3527	529		110		725		6962.2	561.6	Yes
Kenya	Tsavo-Amboseli	unprotected	sample	2147	755.522		59		27.5		17755.1	628.343	No
Malawi	Kasungu NP	ENTIRE ECOSYSTEM	total	40	0						2316	2316
Malawi	Kasungu NP	Kasungu NP	total	40	0						2316	2316	Yes
Malawi	Liwonde NP	ENTIRE ECOSYSTEM	total	777	0	0	4				675	675
Malawi	Liwonde NP	Liwonde NP	total	777	0	0	4	0	12		675	675	Yes
Mali	Gourma	ENTIRE ECOSYSTEM	total	253	0	0	0	0	28		3944	3944
Mali	Gourma	Gourma	total	253	0	0	0	0	28		3944	3944	No
Mozambique	Limpopo NP	ENTIRE ECOSYSTEM	sample	1254	352.918	0	10	113	128		15211	1799.12
Mozambique	Limpopo NP	Limpopo NP	sample	1081	327.283	0	10	90	128		11971	1610.13	Yes
Mozambique	Limpopo NP	southern reach	sample	173	132.049	0	0	23	0		3240	188.99	No
Mozambique	Marromeo Buffalo R	ENTIRE ECOSYSTEM	sample	606	306.635	0	5	0	0		2307	437.73
Mozambique	Marromeo Buffalo R	Marromeo Buffalo R	sample	606	306.635	0	5	0	0		2307	437.73	Yes
Mozambique	Niassa NR	ENTIRE ECOSYSTEM	sample	5457	756.261	49	142	1212	1979		48838	5091.38
Mozambique	Niassa NR	Niassa NR	sample	4441	693.642	38	132	1170	1843		42140	4449.69	Yes
Mozambique	Niassa NR	southern extension	sample	1016	301.317	11	10	42	136		6698	641.69	No
Mozambique	Quirimbas NP	ENTIRE ECOSYSTEM	sample	634	248.827	0	77	165	271		14903	1537.88
Mozambique	Quirimbas NP	corridor to Niassa NP	sample	306	167.12	0	48	38	125		3605	376.52	No
Mozambique	Quirimbas NP	Quirimbas NP	sample	328	184.353	0	29	127	146		11298	1161.36	Yes
Mozambique	Tete Province / Magoe	ENTIRE ECOSYSTEM	sample	1654	428.416	0	14	72	199		19818	4100.85
Mozambique	Tete Province / Magoe	Magoe NP	sample	0	0	0	9	14	15		4657	980.55	Yes
Mozambique	Tete Province / Magoe	other areas	sample	1654	428.416	0	5	58	184		15161	3120.3	No
South Africa	Kruger NP	ENTIRE ECOSYSTEM	total	17086	0						19485	19485
South Africa	Kruger NP	Kruger NP	total	17086	0						19485	19485	Yes
South Africa	Tuli	ENTIRE ECOSYSTEM	total	347	0						324.299	324.299
South Africa	Tuli	Mapungubwe NP	total	344	0						278	278	Yes
South Africa	Tuli	private reserves/farms	total	3	0						46	46	No
Tanzania	Burigi-Biharamulo	ENTIRE ECOSYSTEM	sample	402.1	381.3	0	0	30.9	25.03		4713	596
Tanzania	Burigi-Biharamulo	Biharamulo GR	sample	0	0	0	0	0	0		735.43	100.25	Yes
Tanzania	Burigi-Biharamulo	Burigi GR	sample	402.1	381.3	0	0	30.9	7.73		2774.42	379.18	Yes
Tanzania	Burigi-Biharamulo	Kimisi GR	sample	0	0	0	0	0	17.3		863.8	116.1	Yes
Tanzania	Katavi-Rukwa	ENTIRE ECOSYSTEM	sample	5738	1375	0	51.7			616	19953	1775
Tanzania	Katavi-Rukwa	Katavi NP	sample	3128	992	0	17.8			320	4187	470.4	Yes
Tanzania	Katavi-Rukwa	Lukwati GR	sample	1090	281	0	0			77	3539	244.3	Yes
Tanzania	Katavi-Rukwa	Lwafi GR	total	0	0	0	0			0	1503	1503	Yes
Tanzania	Katavi-Rukwa	Msaginia Open Area	sample	0	0	0	0			0	2254	123.1	Yes
Tanzania	Katavi-Rukwa	Nkamba-Lwafi	sample	209	111	0	0			19	1122	118.2	Yes
Tanzania	Katavi-Rukwa	Out Lukwati E	sample	1116	896	0	17.7			35.4	695	39.2	No
Tanzania	Katavi-Rukwa	Out Lukwati S	sample	73	73	0	0			0	246	13.5	No
Tanzania	Katavi-Rukwa	Out Rukwa E	sample	0	0	0	0			9.2	328	35.7	No
Tanzania	Katavi-Rukwa	Out Rukwa S	sample	0	0	0	0			0	131	14.9	No
Tanzania	Katavi-Rukwa	Rukwa GR	sample	122	67	0	16.2			137.73	4092	458	Yes
Tanzania	Katavi-Rukwa	Urawira Open Area	sample	0	0	0	0			0	456	28.8	Yes
Tanzania	Katavi-Rukwa	Usevia Open Area	sample	0	0	0	0			18	1399	100.69	Yes
Tanzania	Malagarasi-Muyovosi	ENTIRE ECOSYSTEM	sample	2953	1308	0	17			1183	44809	2509
Tanzania	Malagarasi-Muyovosi	Kigosi GR	sample	0	0	0	0			125	8275	465.2	Yes
Tanzania	Malagarasi-Muyovosi	Makere FR	sample	0	0	0	0			0	790	43.6	Yes
Tanzania	Malagarasi-Muyovosi	Moyowosi GR	sample	1644.8	1219	0	0			506	11320	626.3	Yes
Tanzania	Malagarasi-Muyovosi	Moyowosi out	sample	0	0	0	0			0	208	11.5	No
Tanzania	Malagarasi-Muyovosi	Ramsar site	sample	502.9	302.3	0	17			243	8195	472.6	No
Tanzania	Malagarasi-Muyovosi	Ugalla GR	sample	659.8	280.5	0	0			220	4913	268.1	Yes
Tanzania	Malagarasi-Muyovosi	Ugalla out	sample	145.6	142.45	0	0			90	11108	622.5	No
Tanzania	Ruaha-Rungwa	ENTIRE ECOSYSTEM	sample	8272	1623		90.5			3296	50368	2870.98
Tanzania	Ruaha-Rungwa	Itigi Thickets	sample	228	226.4		0			86	5607	196.6	Yes
Tanzania	Ruaha-Rungwa	Kizigo GR	sample	758	506.3		0			288	5057	333.6	Yes
Tanzania	Ruaha-Rungwa	Muhesi GR	sample	0	0		0			157	4252	271	Yes
Tanzania	Ruaha-Rungwa	Ruaha NP	sample	4210	1164		17.4			984	20110	1165	Yes
Tanzania	Ruaha-Rungwa	Rungwa GR	sample	2801	971		57.8			1581	9018	524.7	Yes
Tanzania	Ruaha-Rungwa	unprotected areas	sample	275	169.692		15.3			200	5645	405	No
Tanzania	Selous-Mikumi	ENTIRE ECOSYSTEM	sample	15217	1800		261.1			10013	105730	6474
Tanzania	Selous-Mikumi	Kilombero GCA	sample	0	0		0			101.3	3744	221.9	Yes
Tanzania	Selous-Mikumi	Mikumi NP	sample	885	300		23.2			395	3385	257.2	Yes
Tanzania	Selous-Mikumi	Out E	sample	0	0		0			66.3	1849	217.5	No
Tanzania	Selous-Mikumi	Out Mikumi	sample	144.9	139.6		0			18.1	692	38.2	No
Tanzania	Selous-Mikumi	Out Mikumi W	sample	0	0		0			0	427	28	No
Tanzania	Selous-Mikumi	Out N	sample	0	0		0			0	1280	77.1	No
Tanzania	Selous-Mikumi	Out S (Masasi)	sample	0	0		65.6			919	5726	348.9	No
Tanzania	Selous-Mikumi	Out S (Muhuwesi GCA)	sample	0	0		0			49.2	860	52.5	No
Tanzania	Selous-Mikumi	Out SE	sample	1095	408.5		52.1			1860	11996	690	No
Tanzania	Selous-Mikumi	Out W Mahenge	sample	257	89.1		0			75.5	9178	607.6	No
Tanzania	Selous-Mikumi	Out W Mbalika	sample	239	141.6		0			29.8	3173	212.8	No
Tanzania	Selous-Mikumi	Selous GR	sample	11419	1566		103.8			6074	47323	2738.2	Yes
Tanzania	Selous-Mikumi	Selous-Niassa Corridor	sample	1161	690.2		16.4			425	16097	984.4	Yes
Tanzania	Serengeti	ENTIRE ECOSYSTEM	total	6087	0		5		70		23952	23952
Tanzania	Serengeti	Ikonoa Open Area & WMA	total	232	0						606.52		No
Tanzania	Serengeti	Ikorongo GR	total	160	0								Yes
Tanzania	Serengeti	Loliondo Game Controlled Area	total	76	0								Yes
Tanzania	Serengeti	Makao Open Area & WMA	total	81	0						1097.69		No
Tanzania	Serengeti	Maswa GR	total	179	0								Yes
Tanzania	Serengeti	Ngorongoro CA	total	199	0								Yes
Tanzania	Serengeti	Serengeti NP	total	5160	0						22247.8		Yes
Tanzania	Tarangire-Manyara	ENTIRE ECOSYSTEM	total	4202	0	0	3	22	153	178	18725	18725
Tanzania	Tarangire-Manyara	Burunge WMA	total	220	0						849		Yes
Tanzania	Tarangire-Manyara	Engaruka OA	total	44	0						1452		No
Tanzania	Tarangire-Manyara	Kwakuchinja OA	total	70	0						547		No
Tanzania	Tarangire-Manyara	Lolkisale GCA	total	425	0						818		Yes
Tanzania	Tarangire-Manyara	Makame WMA	total	85	0						4691		Yes
Tanzania	Tarangire-Manyara	Manyara NP	total	34	0						593		Yes
Tanzania	Tarangire-Manyara	Mkungunero GR	total	2	0						2523		Yes
Tanzania	Tarangire-Manyara	Mto wa Mbu GCA	total	19	0						1291		Yes
Tanzania	Tarangire-Manyara	Simanjiro GCA	total	21	0						3324		Yes
Tanzania	Tarangire-Manyara	Tarangire NP	total	3282	0						2637		Yes
Uganda	Greater Virunga Landscape	ENTIRE ECOSYSTEM	sample	2913	932						2269.15	242.6
Uganda	Greater Virunga Landscape	Queen Elizabeth NP	sample	2913	932						2269.15	242.6	Yes
Uganda	Kidepo Valley NP & Karenga CWA	ENTIRE ECOSYSTEM	total	621	0	0	0			1	2398	2398
Uganda	Kidepo Valley NP & Karenga CWA	Karenga CWA	total	214	0	0	0	0	0		956	956	Yes
Uganda	Kidepo Valley NP & Karenga CWA	Kidepo Valley NP	total	407	0	0	0	0	1		1442	1442	Yes
Uganda	Murchison Falls Protected Area	ENTIRE ECOSYSTEM	sample	1330	441	0	0			9.05	6270.78	1947.6
Uganda	Murchison Falls Protected Area	Murchison Falls Protected Area	sample	1330	441	0	0			9.05	6270.78	1947.6	Yes
W. Africa	WAP	ENTIRE ECOSYSTEM	sample	8911	1299	86	210	198	435		29981	2913.6
W. Africa	WAP	WAP	sample	8911	1299	86	210	198	435		29981	2913.6	Yes
Zambia	Kafue	ENTIRE ECOSYSTEM	sample	6688	1410.95	0	9			505	44985	3338.11
Zambia	Kafue	Kafue GMAs	sample	1876	819.315	0	0			226	22755	1313.68	Yes
Zambia	Kafue	Kafue NP	sample	4813	1148.69	0	9			279	22230	2024.43	Yes
Zambia	Lower Zambezi	ENTIRE ECOSYSTEM	sample	1125	307.55	0	10	0	67		2528	265.187
Zambia	Lower Zambezi	Lower Zambezi GMAs	sample	153	86.3736	0	10	0	38		1383	126.3	Yes
Zambia	Lower Zambezi	Lower Zambezi NP	sample	973	295.289	0	0	0	29		1145	148.7	Yes
Zambia	Luangwa	ENTIRE ECOSYSTEM	sample	13898	1801.97	0	0	8	161		32819	2494.24
Zambia	Luangwa	Luambe NP	sample	54	38.6691	0	0	0	0		344	28.84	Yes
Zambia	Luangwa	Luangwa GMAs	sample	5869	1574.47	0	0	8	79		13933	1146.8	Yes
Zambia	Luangwa	Luangwa North NP	sample	4673	903.292	0	0	0	8		4676	426.46	Yes
Zambia	Luangwa	Luangwa South NP	sample	3302	604.944	0	0	0	73		8646	630.78	Yes
Zambia	Luangwa	Lukusuzi NP	sample	0	0	0	0	0	0		2623	133.55	Yes
Zambia	West Zambezi	ENTIRE ECOSYSTEM	sample	48	38.3614	8	0	8	262		4482.3	545.2
Zambia	West Zambezi	Sioma Ngwezi NP	sample	48	38.3614	8	0	8	262		4482.3	545.2	Yes
Zimbabwe	Gonarezhou NP & Save Valley Conservancy	ENTIRE ECOSYSTEM	sample	13037	1548.35	0	9	157	531		10409	1115.1
Zimbabwe	Gonarezhou NP & Save Valley Conservancy	Communal Land	sample	332	224.851	0	0	0	0		221	23.3	No
Zimbabwe	Gonarezhou NP & Save Valley Conservancy	Gonarezhou NP	sample	11120	1382.03	0	0	90	421		4941	641	Yes
Zimbabwe	Gonarezhou NP & Save Valley Conservancy	Malapati Safari Area	sample	0	0	0	0	0	10		177	19.1	Yes
Zimbabwe	Gonarezhou NP & Save Valley Conservancy	Mozambique stratum	sample	0	0	0	9	40	61		1574	154.5	No
Zimbabwe	Gonarezhou NP & Save Valley Conservancy	Save Valley Conservancy	sample	1585	660.93	0	0	27	40		3496	277.2	Yes
Zimbabwe	NW Matabeleland	ENTIRE ECOSYSTEM	sample	53991	3891.02	42	149	1001	2871		24959	1877.2
Zimbabwe	NW Matabeleland	Communal Areas	sample	2201	1562.45	0	0	0	0		3075	113.2	No
Zimbabwe	NW Matabeleland	Forest Areas	sample	1101	506.563	0	27	71	226		2332	116.9	Yes
Zimbabwe	NW Matabeleland	Hwange NP	sample	45846	3185.73	42	63	797	2015		15168	1432.2	Yes
Zimbabwe	NW Matabeleland	Matetsi Complex	sample	4843	1514.38	0	59	133	630		4384	214.9	Yes
Zimbabwe	Sebungwe	ENTIRE ECOSYSTEM	sample	3407	610.008	12	64	259	1141		15227	2052.83
Zimbabwe	Sebungwe	All communal lands	sample	497	203.544	0	0	22	214		8732	987.02	No
Zimbabwe	Sebungwe	Chete SA	sample	278	113.508	0	0	18	75		1242	157.2	Yes
Zimbabwe	Sebungwe	Chirisa SA	sample	1200	385.139	5	48	160	335		1530	86	Yes
Zimbabwe	Sebungwe	Chizarira NP	sample	747	391.156	7	15	24	372		2096	330.5	Yes
Zimbabwe	Sebungwe	Matusadona NP	sample	669	128.012	0	0	28	87		1366	460.27	Yes
Zimbabwe	Sebungwe	Sijarira FA	sample	16	8.66025	0	0	8	57		261	31.842	Yes
Zimbabwe	Tuli	ENTIRE ECOSYSTEM	total	212	0						1253.33	1253.33
Zimbabwe	Tuli	Nottingham & Sentinel	total	154	0						770	770	No
Zimbabwe	Tuli	Tuli Safari Area	total	58	0						483.333	483.333	Yes
Zimbabwe	Zambezi Valley	ENTIRE ECOSYSTEM	sample	11657	1136.98	0	13	18	693		17003	2142.38
Zimbabwe	Zambezi Valley	Charara SA	sample	36	24.0208	0	13	5	5		1662	251.389	Yes
Zimbabwe	Zambezi Valley	Chewore SA	sample	3303	461.926	0	0	0	160		3303	478.556	Yes
Zimbabwe	Zambezi Valley	Communal Lands	sample	1904	706.31	0	0	0	117		4746	496.594	No
Zimbabwe	Zambezi Valley	Doma SA	sample	153	89.398	0	0	0	0		991	173.425	Yes
Zimbabwe	Zambezi Valley	Hurungwe SA	sample	2698	582.011	0	0	0	197		3020	447.586	Yes
Zimbabwe	Zambezi Valley	Mana Pools NP	sample	2984	447.447	0	0	12	152		2169	223.288	Yes
Zimbabwe	Zambezi Valley	Sapi SA	sample	578	181.521	0	0	0	62		1112	71.54	Yes

## Sheet: Metadata
Column	Detailed description, if necessary
Country
Ecosystem
Stratum
Count type	"sample + total" indicates that both types of count were conducted on various strata
Elephants	Estimated number of elephants.
SE	Standard error of elephant population estimate
Carcass 1	Estimated number of carcasses in category 1. Some surveys only reported carcasses in 2 categories, 1+2 and 3+4. For those surveys, category 1 may be blank or set to 0.
Carcass 2	Estimated number of carcasses in category 2. As above, for some surveys, this may indicate carcasses in category 1+2 combined.
Carcass 3	Estimated number of carcasses in category 3.
Carcass 4	Estimated number of carcasses in category 4.
All Carcasses	Estimated number of carcasses for all categories combined. Some studies reported either a single estimate for all carcass categories combined or separate estimates for 1+2 carcasses and all carcasses combined.
Survey area	Area of stratum or ecosystem.
Total area surveyed	This is the actual area surveyed on sample counts
Protected	Only listed for strata, not for entire ecosystems, which often included protected and unprotected areas.
