# Supplementary material for: Continent-wide survey reveals massive decline in African savannah elephants
Source: PeerJ. 2016 Aug 31;4:e2354. doi: 10.7717/peerj.2354 (PMC5012305; doi:10.7717/peerj.2354)
Supplement: Data S2 — File includes GEC and historical estimates used to estimate trends in elephant populations from 1995-2014. [file peerj-04-2354-s016.xlsx]

## Sheet: Data
Country	Ecosystem	Stratum	Year	Estimate	SE	Source
Angola	Southeast Angola	Southeast Angola	2005	1827	598	GEC report
Angola	Southeast Angola	Southeast Angola	2015	1437	600	Chase & Griffin. 2011. African Journal of Ecology 49: 353–361.
Botswana	Northern Botswana	Central district	1995	499	367.566	Schlossberg et al. unpublished manuscript (based on re-analysis of raw survey data)
Botswana	Northern Botswana	Central district	1996	1543	519.644	Schlossberg et al. unpublished manuscript (based on re-analysis of raw survey data)
Botswana	Northern Botswana	Central district	1999	954	479.976	Schlossberg et al. unpublished manuscript (based on re-analysis of raw survey data)
Botswana	Northern Botswana	Central district	2001	9361	3038.51	Schlossberg et al. unpublished manuscript (based on re-analysis of raw survey data)
Botswana	Northern Botswana	Central district	2002	3213	710.736	Schlossberg et al. unpublished manuscript (based on re-analysis of raw survey data)
Botswana	Northern Botswana	Central district	2004	14221	4328.87	Schlossberg et al. unpublished manuscript (based on re-analysis of raw survey data)
Botswana	Northern Botswana	Central district	2006	21192	4613.54	Schlossberg et al. unpublished manuscript (based on re-analysis of raw survey data)
Botswana	Northern Botswana	Central district	2010	7500	1205.35	Schlossberg et al. unpublished manuscript (based on re-analysis of raw survey data)
Botswana	Northern Botswana	Central district	2012	6796	2249.78	Schlossberg et al. unpublished manuscript (based on re-analysis of raw survey data)
Botswana	Northern Botswana	Central district	2013	30549	7267.58	Schlossberg et al. unpublished manuscript (based on re-analysis of raw survey data)
Botswana	Northern Botswana	Central district	2014	13813	2739.94	GEC report
Botswana	Northern Botswana	Chobe district	1995	28263	6520.84	Schlossberg et al. unpublished manuscript (based on re-analysis of raw survey data)
Botswana	Northern Botswana	Chobe district	1996	45106	7235.12	Schlossberg et al. unpublished manuscript (based on re-analysis of raw survey data)
Botswana	Northern Botswana	Chobe district	1999	37578	5482.68	Schlossberg et al. unpublished manuscript (based on re-analysis of raw survey data)
Botswana	Northern Botswana	Chobe district	2001	47619	7390.23	Schlossberg et al. unpublished manuscript (based on re-analysis of raw survey data)
Botswana	Northern Botswana	Chobe district	2002	57431	5515.6	Schlossberg et al. unpublished manuscript (based on re-analysis of raw survey data)
Botswana	Northern Botswana	Chobe district	2004	56960	5950.23	Schlossberg et al. unpublished manuscript (based on re-analysis of raw survey data)
Botswana	Northern Botswana	Chobe district	2006	54817	6522.28	Schlossberg et al. unpublished manuscript (based on re-analysis of raw survey data)
Botswana	Northern Botswana	Chobe district	2010	54090	3854.29	Schlossberg et al. unpublished manuscript (based on re-analysis of raw survey data)
Botswana	Northern Botswana	Chobe district	2012	72272	11758.9	Schlossberg et al. unpublished manuscript (based on re-analysis of raw survey data)
Botswana	Northern Botswana	Chobe district	2014	28530	2073.57	GEC report
Botswana	Northern Botswana	Ngamiland	1995	54216	6313.48	Schlossberg et al. unpublished manuscript (based on re-analysis of raw survey data)
Botswana	Northern Botswana	Ngamiland	1996	58602	6747.74	Schlossberg et al. unpublished manuscript (based on re-analysis of raw survey data)
Botswana	Northern Botswana	Ngamiland	1999	75118	8458.88	Schlossberg et al. unpublished manuscript (based on re-analysis of raw survey data)
Botswana	Northern Botswana	Ngamiland	2001	70566	8952.34	Schlossberg et al. unpublished manuscript (based on re-analysis of raw survey data)
Botswana	Northern Botswana	Ngamiland	2002	66009	6721.59	Schlossberg et al. unpublished manuscript (based on re-analysis of raw survey data)
Botswana	Northern Botswana	Ngamiland	2004	79216	6976.38	Schlossberg et al. unpublished manuscript (based on re-analysis of raw survey data)
Botswana	Northern Botswana	Ngamiland	2006	80519	6666.75	Schlossberg et al. unpublished manuscript (based on re-analysis of raw survey data)
Botswana	Northern Botswana	Ngamiland	2010	63063	2938.67	Schlossberg et al. unpublished manuscript (based on re-analysis of raw survey data)
Botswana	Northern Botswana	Ngamiland	2012	123128	12837.5	Schlossberg et al. unpublished manuscript (based on re-analysis of raw survey data)
Botswana	Northern Botswana	Ngamiland	2013	55513	5846.53	Schlossberg et al. unpublished manuscript (based on re-analysis of raw survey data)
Botswana	Northern Botswana	Ngamiland	2014	60755	2555.19	GEC report
Botswana	Tuli	farms	2000	395	0	historical data cited in GEC report
Botswana	Tuli	farms	2001	446	0	historical data cited in GEC report
Botswana	Tuli	farms	2004	535	0	historical data cited in GEC report
Botswana	Tuli	farms	2007	244	0	historical data cited in GEC report
Botswana	Tuli	farms	2008	636	0	historical data cited in GEC report
Botswana	Tuli	farms	2010	190	0	historical data cited in GEC report
Botswana	Tuli	farms	2012	367	0	historical data cited in GEC report
Botswana	Tuli	farms	2014	502	0	GEC report
Botswana	Tuli	Northern Tuli GR	2000	490	0	historical data cited in GEC report
Botswana	Tuli	Northern Tuli GR	2001	718	0	historical data cited in GEC report
Botswana	Tuli	Northern Tuli GR	2004	278	0	historical data cited in GEC report
Botswana	Tuli	Northern Tuli GR	2007	619	0	historical data cited in GEC report
Botswana	Tuli	Northern Tuli GR	2008	477	0	historical data cited in GEC report
Botswana	Tuli	Northern Tuli GR	2010	463	0	historical data cited in GEC report
Botswana	Tuli	Northern Tuli GR	2012	320	0	historical data cited in GEC report
Botswana	Tuli	Northern Tuli GR	2014	388	0	GEC report
Cameroon	N. Soudanian Savannahs	N. Soudianian Savannahs	2008	525	0	Omondi et al. 2008. TOTAL AERIAL COUNT OF ELEPHANTS AND OTHER WILDLIFE SPECIES IN FARO, BENOUE AND BOUBA NDJIDDA NATIONAL PARKS AND ADJACENT HUNTING BLOCKS IN NORTHERN CAMEROON
Cameroon	N. Soudanian Savannahs	N. Soudianian Savannahs	2015	140	80.5	GEC report
Chad	Binder Lere R	Binder Lere R	2010	236	0	historical data cited in GEC report
Chad	Binder Lere R	Binder Lere R	2014	132	0	GEC report
Chad	Zakouma NP	Zakouma NP	1995	1750		historical data cited in GEC report
Chad	Zakouma NP	Zakouma NP	2002	4351	899.107	historical data cited in GEC report
Chad	Zakouma NP	Zakouma NP	2005	3885	0	historical data cited in GEC report
Chad	Zakouma NP	Zakouma NP	2006	3020	0	historical data cited in GEC report
Chad	Zakouma NP	Zakouma NP	2008	937	553.442	historical data cited in GEC report
Chad	Zakouma NP	Zakouma NP	2009	617	0	historical data cited in GEC report
Chad	Zakouma NP	Zakouma NP	2010	542	0	historical data cited in GEC report
Chad	Zakouma NP	Zakouma NP	2011	454	0	historical data cited in GEC report
Chad	Zakouma NP	Zakouma NP	2012	444	0	historical data cited in GEC report
Chad	Zakouma NP	Zakouma NP	2014	443	0	GEC report
DR Congo	Garamba NP	Garamba NP	2007	3636	0	historical data cited in GEC report
DR Congo	Garamba NP	Garamba NP	2012	1717	0	historical data cited in GEC report
DR Congo	Garamba NP	Garamba NP	2014	1156	0	GEC report
DR Congo	Greater Virunga Landscape	Virunga NP	2003	286	105	historical data cited in GEC report
DR Congo	Greater Virunga Landscape	Virunga NP	2006	348	90.3061	historical data cited in GEC report
DR Congo	Greater Virunga Landscape	Virunga NP	2010	347	291.153	historical data cited in GEC report
DR Congo	Greater Virunga Landscape	Virunga NP	2014	35	27	GEC report
Kenya	Laikipia-Samburu	Laikipia-Samburu	2002	5458	0	Omondi et al. 2002. Total aerial count of elephants in the Laikipia-Samburu ecosystem: June 2002. KWS.
Kenya	Laikipia-Samburu	Laikipia-Samburu	2012	6365	0	raw data from KWS from 2010 total count
Kenya	Laikipia-Samburu	Laikipia-Samburu	2014	7134	786	GEC report
Kenya	Masai Mara	Masai Mara R	1997	3373	1553.42	Ogutu et al. 2011. Journal of Zoology 285:99-109.
Kenya	Masai Mara	Masai Mara R	2005	403	193.995	Ogutu et al. 2011. Journal of Zoology 285:99-109.
Kenya	Masai Mara	Masai Mara R	2007	800	420.584	Ogutu et al. 2011. Journal of Zoology 285:99-109.
Kenya	Masai Mara	Masai Mara R	2010	1769	0	Ogutu et al. 2011. Journal of Zoology 285:99-109.
Kenya	Masai Mara	Masai Mara R	2014	921	0	GEC report
Kenya	Masai Mara	unprotected areas	1997	1393	680.213	Ogutu et al. 2011. Journal of Zoology 285:99-109.
Kenya	Masai Mara	unprotected areas	2005	834	487.55	Ogutu et al. 2011. Journal of Zoology 285:99-109.
Kenya	Masai Mara	unprotected areas	2007	170	105.114	Ogutu et al. 2011. Journal of Zoology 285:99-109.
Kenya	Masai Mara	unprotected areas	2010	1300	0	Ogutu et al. 2011. Journal of Zoology 285:99-109.
Kenya	Masai Mara	unprotected areas	2014	571	0	GEC report
Kenya	Tsavo-Amboseli	Tsavo East NP north	1999	1337	0	Ngene et al. 2013. Pachyderm 53:38-50.
Kenya	Tsavo-Amboseli	Tsavo East NP north	2002	4089	0	Ngene et al. 2013. Pachyderm 53:38-50.
Kenya	Tsavo-Amboseli	Tsavo East NP north	2005	2499	0	Ngene et al. 2013. Pachyderm 53:38-50.
Kenya	Tsavo-Amboseli	Tsavo East NP north	2008	4118	0	Ngene et al. 2013. Pachyderm 53:38-50.
Kenya	Tsavo-Amboseli	Tsavo East NP north	2011	2094	0	Ngene et al. 2013. Pachyderm 53:38-50.
Kenya	Tsavo-Amboseli	Tsavo East NP north	2014	1941	830	GEC report
Kenya	Tsavo-Amboseli	Tsavo East NP north	2014	1034	0	Kyale et al. 2014. Tsavo-Mkomzai Total Aerial Census for Elephants and Large Animals. KWS.
Kenya	Tsavo-Amboseli	Tsavo East NP south	1999	3221	0	Ngene et al. 2013. Pachyderm 53:38-50.
Kenya	Tsavo-Amboseli	Tsavo East NP south	2002	2087	0	Ngene et al. 2013. Pachyderm 53:38-50.
Kenya	Tsavo-Amboseli	Tsavo East NP south	2005	3896	0	Ngene et al. 2013. Pachyderm 53:38-50.
Kenya	Tsavo-Amboseli	Tsavo East NP south	2008	3731	0	Ngene et al. 2013. Pachyderm 53:38-50.
Kenya	Tsavo-Amboseli	Tsavo East NP south	2011	4120	0	Ngene et al. 2013. Pachyderm 53:38-50.
Kenya	Tsavo-Amboseli	Tsavo East NP south	2014	6453	1329	GEC report
Kenya	Tsavo-Amboseli	Tsavo East NP south	2014	5310	0	Kyale et al. 2014. Tsavo-Mkomzai Total Aerial Census for Elephants and Large Animals. KWS.
Kenya	Tsavo-Amboseli	Tsavo West NP	1999	2119	0	Ngene et al. 2013. Pachyderm 53:38-50.
Kenya	Tsavo-Amboseli	Tsavo West NP	2002	2168	0	Ngene et al. 2013. Pachyderm 53:38-50.
Kenya	Tsavo-Amboseli	Tsavo West NP	2005	2626	0	Ngene et al. 2013. Pachyderm 53:38-50.
Kenya	Tsavo-Amboseli	Tsavo West NP	2008	2161	0	Ngene et al. 2013. Pachyderm 53:38-50.
Kenya	Tsavo-Amboseli	Tsavo West NP	2011	2142	0	Ngene et al. 2013. Pachyderm 53:38-50.
Kenya	Tsavo-Amboseli	Tsavo West NP	2014	2725	1083	GEC report
Kenya	Tsavo-Amboseli	Tsavo West NP	2014	3104	0	Kyale et al. 2014. Tsavo-Mkomzai Total Aerial Census for Elephants and Large Animals. KWS.
Malawi	Kasungu NP	Kasungu NP	2005	58	111	African Elephant Database
Malawi	Kasungu NP	Kasungu NP	2014	40	0	GEC report
Malawi	Liwonde NP	Liwonde NP	2006	530	0	historical data cited in GEC report
Malawi	Liwonde NP	Liwonde NP	2007	696	0	historical data cited in GEC report
Malawi	Liwonde NP	Liwonde NP	2009	501	0	historical data cited in GEC report
Malawi	Liwonde NP	Liwonde NP	2010	404	0	historical data cited in GEC report
Malawi	Liwonde NP	Liwonde NP	2011	545	0	historical data cited in GEC report
Malawi	Liwonde NP	Liwonde NP	2012	678	0	historical data cited in GEC report
Malawi	Liwonde NP	Liwonde NP	2014	777	0	GEC report
Mali	Gourma	Gourma	2002	322	0	Blake et al. 2003. The last Sahelian Elephants. Save the Elephants.
Mali	Gourma	Gourma	2007	344	0	Bouche. 2007. Denombrement des elephants du Gourma.
Mali	Gourma	Gourma	2015	253	0	GEC report
Mozambique	Limpopo NP	Limpopo NP	2010	1425		Stephenson. 2010. Parque Nacionale do Limpopo aerial wildlife census. Wildlife Management Services.
Mozambique	Limpopo NP	Limpopo NP	2014	1081	327.283	GEC report
Mozambique	Marromeo Buffalo R	Marromeo Buffalo R	2000	219	0	Beilfuss et al. 2010. Status and distribution of large herbivores in the Marromeu Complex of the Zambezi Delta, Mozambique. WWF.
Mozambique	Marromeo Buffalo R	Marromeo Buffalo R	2001	421	0	Beilfuss et al. 2010. Status and distribution of large herbivores in the Marromeu Complex of the Zambezi Delta, Mozambique. WWF.
Mozambique	Marromeo Buffalo R	Marromeo Buffalo R	2006	388	0	Beilfuss et al. 2010. Status and distribution of large herbivores in the Marromeu Complex of the Zambezi Delta, Mozambique. WWF.
Mozambique	Marromeo Buffalo R	Marromeo Buffalo R	2007	355	0	Beilfuss et al. 2010. Status and distribution of large herbivores in the Marromeu Complex of the Zambezi Delta, Mozambique. WWF.
Mozambique	Marromeo Buffalo R	Marromeo Buffalo R	2008	267	0	Beilfuss et al. 2010. Status and distribution of large herbivores in the Marromeu Complex of the Zambezi Delta, Mozambique. WWF.
Mozambique	Marromeo Buffalo R	Marromeo Buffalo R	2014	606	306.635	GEC report
Mozambique	Niassa NR	Niassa NR	1998	8707	968.275	historical data cited in GEC report
Mozambique	Niassa NR	Niassa NR	2000	11828	1069.93	historical data cited in GEC report
Mozambique	Niassa NR	Niassa NR	2002	13061	1241.15	historical data cited in GEC report
Mozambique	Niassa NR	Niassa NR	2004	12477	1077.21	historical data cited in GEC report
Mozambique	Niassa NR	Niassa NR	2006	11833	1151.57	historical data cited in GEC report
Mozambique	Niassa NR	Niassa NR	2009	20364	1389.13	historical data cited in GEC report
Mozambique	Niassa NR	Niassa NR	2011	12029	1291.33	historical data cited in GEC report
Mozambique	Niassa NR	Niassa NR	2014	4441	693.642	GEC report
Mozambique	Quirimbas NP	Quirimbas NP	2011	555	228.571	Craig. 2012. Aerial Survey of Quirimbas National park and Adjacent Areas, Mozambique, October 2011. WWF Mozambique.
Mozambique	Quirimbas NP	Quirimbas NP	2013	560	240.591	Craig. 2013. Aerial Survey of Quirimbas National Park and Adjoining Areas, 2013. WWF Mozambique.
Mozambique	Quirimbas NP	Quirimbas NP	2014	328	184.353	GEC report
Mozambique	Tete Province / Magoe	east of Musengezi	2010	519	121.742	Dunham. 2010. Aerial Survey of Elephants and other Large Herbivores South of Lake Cabora Bassa, Mozambique: 2010. AGRECO G.E.I.E.
Mozambique	Tete Province / Magoe	east of Musengezi	2014	603	220.41	GEC report
Mozambique	Tete Province / Magoe	west of Musengezi	1995	137	95.4082	African Elephant Database
Mozambique	Tete Province / Magoe	west of Musengezi	1999	400	125.51	African Elephant Database
Mozambique	Tete Province / Magoe	west of Musengezi	2000	1217	0	African Elephant Database
Mozambique	Tete Province / Magoe	west of Musengezi	2001	1264	693.367	African Elephant Database
Mozambique	Tete Province / Magoe	west of Musengezi	2003	1628	405.102	African Elephant Database
Mozambique	Tete Province / Magoe	west of Musengezi	2010	1465	527.33	Dunham. 2010. Aerial Survey of Elephants and other Large Herbivores South of Lake Cabora Bassa, Mozambique: 2010. AGRECO G.E.I.E.
Mozambique	Tete Province / Magoe	west of Musengezi	2014	1051	375.51	GEC report
South Africa	Kruger NP	Kruger NP	1995	8064	0	S. Ferreira, personal communication.
South Africa	Kruger NP	Kruger NP	1996	8320	0	S. Ferreira, personal communication.
South Africa	Kruger NP	Kruger NP	1997	8371	0	S. Ferreira, personal communication.
South Africa	Kruger NP	Kruger NP	1998	8869	0	S. Ferreira, personal communication.
South Africa	Kruger NP	Kruger NP	1999	9152	0	S. Ferreira, personal communication.
South Africa	Kruger NP	Kruger NP	2000	8356	0	S. Ferreira, personal communication.
South Africa	Kruger NP	Kruger NP	2001	9276	0	S. Ferreira, personal communication.
South Africa	Kruger NP	Kruger NP	2002	10459	0	S. Ferreira, personal communication.
South Africa	Kruger NP	Kruger NP	2003	11672	0	S. Ferreira, personal communication.
South Africa	Kruger NP	Kruger NP	2004	11483	0	S. Ferreira, personal communication.
South Africa	Kruger NP	Kruger NP	2005	12467	0	S. Ferreira, personal communication.
South Africa	Kruger NP	Kruger NP	2006	12427	0	S. Ferreira, personal communication.
South Africa	Kruger NP	Kruger NP	2007	13050	0	S. Ferreira, personal communication.
South Africa	Kruger NP	Kruger NP	2008	12930	0	S. Ferreira, personal communication.
South Africa	Kruger NP	Kruger NP	2009	13573	0	S. Ferreira, personal communication.
South Africa	Kruger NP	Kruger NP	2010	13750	0	S. Ferreira, personal communication.
South Africa	Kruger NP	Kruger NP	2011	14454	0	S. Ferreira, personal communication.
South Africa	Kruger NP	Kruger NP	2012	16571	0	S. Ferreira, personal communication.
South Africa	Kruger NP	Kruger NP	2015	17086	0	GEC report
South Africa	Tuli	Mapungubwe NP	2000	0	0	historical data cited in GEC report
South Africa	Tuli	Mapungubwe NP	2001	11	0	historical data cited in GEC report
South Africa	Tuli	Mapungubwe NP	2004	2	0	historical data cited in GEC report
South Africa	Tuli	Mapungubwe NP	2007	98	0	historical data cited in GEC report
South Africa	Tuli	Mapungubwe NP	2008	82	0	historical data cited in GEC report
South Africa	Tuli	Mapungubwe NP	2010	280	0	historical data cited in GEC report
South Africa	Tuli	Mapungubwe NP	2012	127	0	historical data cited in GEC report
South Africa	Tuli	Mapungubwe NP	2014	344	0	GEC report
Tanzania	Burigi-Biharamulo	Burigi-Biharamulo	2000	761	410	African Elephant Database
Tanzania	Burigi-Biharamulo	Burigi-Biharamulo	2009	1295	785	historical data cited in GEC report
Tanzania	Burigi-Biharamulo	Burigi-Biharamulo	2014	402	381	GEC report
Tanzania	Katavi-Rukwa	Katavi-Rukwa	1998	5078	325	historical data cited in GEC report
Tanzania	Katavi-Rukwa	Katavi-Rukwa	2000	6805	3053	historical data cited in GEC report
Tanzania	Katavi-Rukwa	Katavi-Rukwa	2002	5732	2448	historical data cited in GEC report
Tanzania	Katavi-Rukwa	Katavi-Rukwa	2006	6261	686	historical data cited in GEC report
Tanzania	Katavi-Rukwa	Katavi-Rukwa	2009	6396	1920	historical data cited in GEC report
Tanzania	Katavi-Rukwa	Katavi-Rukwa	2012	7107	2627	historical data cited in GEC report
Tanzania	Katavi-Rukwa	Katavi-Rukwa	2014	3514	1022	GEC report
Tanzania	Malagarasi-Muyovosi	Malagarasi-Muyovosi	2001	7740	2287	historical data cited in GEC report
Tanzania	Malagarasi-Muyovosi	Malagarasi-Muyovosi	2006	19640	2499	historical data cited in GEC report
Tanzania	Malagarasi-Muyovosi	Malagarasi-Muyovosi	2009	14907	2962	historical data cited in GEC report
Tanzania	Malagarasi-Muyovosi	Malagarasi-Muyovosi	2014	2953	1308	GEC report
Tanzania	Ruaha-Rungwa	Ruaha-Rungwa	2002	24993	3027	historical data cited in GEC report
Tanzania	Ruaha-Rungwa	Ruaha-Rungwa	2006	35461	3653	historical data cited in GEC report
Tanzania	Ruaha-Rungwa	Ruaha-Rungwa	2009	31625	2890	historical data cited in GEC report
Tanzania	Ruaha-Rungwa	Ruaha-Rungwa	2013	20090	3282	historical data cited in GEC report
Tanzania	Ruaha-Rungwa	Ruaha-Rungwa	2014	8272	1652	GEC report
Tanzania	Selous-Mikumi	Selous-Mikumi	1998	55672	7690	historical data cited in GEC report
Tanzania	Selous-Mikumi	Selous-Mikumi	2002	63039	8136	historical data cited in GEC report
Tanzania	Selous-Mikumi	Selous-Mikumi	2006	70406	24843	historical data cited in GEC report
Tanzania	Selous-Mikumi	Selous-Mikumi	2009	38975	2644	historical data cited in GEC report
Tanzania	Selous-Mikumi	Selous-Mikumi	2013	13084	1816	historical data cited in GEC report
Tanzania	Selous-Mikumi	Selous-Mikumi	2014	15217	1800	GEC report
Tanzania	Serengeti	Serengeti	1998	2097	0	historical data cited in GEC report
Tanzania	Serengeti	Serengeti	2000	1650	0	historical data cited in GEC report
Tanzania	Serengeti	Serengeti	2003	2143	0	historical data cited in GEC report
Tanzania	Serengeti	Serengeti	2008	3421	0	historical data cited in GEC report
Tanzania	Serengeti	Serengeti	2014	6087	0	GEC report
Tanzania	Tarangire-Manyara	Tarangire-Manyara	1995	2334	0	historical data cited in GEC report
Tanzania	Tarangire-Manyara	Tarangire-Manyara	1998	1997	0	historical data cited in GEC report
Tanzania	Tarangire-Manyara	Tarangire-Manyara	2000	2385	0	historical data cited in GEC report
Tanzania	Tarangire-Manyara	Tarangire-Manyara	2004	1890	0	historical data cited in GEC report
Tanzania	Tarangire-Manyara	Tarangire-Manyara	2006	1938	0	historical data cited in GEC report
Tanzania	Tarangire-Manyara	Tarangire-Manyara	2009	2565	0	historical data cited in GEC report
Tanzania	Tarangire-Manyara	Tarangire-Manyara	2014	4202	0	GEC report
Uganda	Greater Virunga Landscape	Queen Elizabeth NP	1995	1088		historical data cited in GEC report
Uganda	Greater Virunga Landscape	Queen Elizabeth NP	1999	1353	408.163	historical data cited in GEC report
Uganda	Greater Virunga Landscape	Queen Elizabeth NP	2000	1086	469.388	historical data cited in GEC report
Uganda	Greater Virunga Landscape	Queen Elizabeth NP	2002	998	0	historical data cited in GEC report
Uganda	Greater Virunga Landscape	Queen Elizabeth NP	2004	2497	0	historical data cited in GEC report
Uganda	Greater Virunga Landscape	Queen Elizabeth NP	2006	2959	753.233	historical data cited in GEC report
Uganda	Greater Virunga Landscape	Queen Elizabeth NP	2010	2502	735.165	historical data cited in GEC report
Uganda	Greater Virunga Landscape	Queen Elizabeth NP	2012	3018	649.287	historical data cited in GEC report
Uganda	Greater Virunga Landscape	Queen Elizabeth NP	2014	2913	932	GEC report
Uganda	Kidepo Valley NP & Karenga CWA	Kidepo Valley NP	1998	250	0	historical data cited in GEC report
Uganda	Kidepo Valley NP & Karenga CWA	Kidepo Valley NP	2000	390	0	historical data cited in GEC report
Uganda	Kidepo Valley NP & Karenga CWA	Kidepo Valley NP	2002	420	0	historical data cited in GEC report
Uganda	Kidepo Valley NP & Karenga CWA	Kidepo Valley NP	2005	454	0	historical data cited in GEC report
Uganda	Kidepo Valley NP & Karenga CWA	Kidepo Valley NP	2008	497	0	historical data cited in GEC report
Uganda	Kidepo Valley NP & Karenga CWA	Kidepo Valley NP	2012	440	0	historical data cited in GEC report
Uganda	Kidepo Valley NP & Karenga CWA	Kidepo Valley NP	2014	407	0	GEC report
Uganda	Murchison Falls Protected Area	Murchison Falls PA	1995	336	153.061	historical data cited in GEC report
Uganda	Murchison Falls Protected Area	Murchison Falls PA	1999	778	557.143	historical data cited in GEC report
Uganda	Murchison Falls Protected Area	Murchison Falls PA	2002	692	0	historical data cited in GEC report
Uganda	Murchison Falls Protected Area	Murchison Falls PA	2005	516	323.98	historical data cited in GEC report
Uganda	Murchison Falls Protected Area	Murchison Falls PA	2010	904	333	historical data cited in GEC report
Uganda	Murchison Falls Protected Area	Murchison Falls PA	2012	1617	599.206	historical data cited in GEC report
Uganda	Murchison Falls Protected Area	Murchison Falls PA	2014	1330	441	GEC report
W. Africa	W-Arly-Pendjari (WAP)	WAP	2003	4592	0	historical data cited in GEC report
W. Africa	WAP	WAP	2015	8911	1299	GEC report
Zambia	Kafue	Kafue GMAs	2006	1767		Frederick. 2011. Aerial Survey: Kafue Ecosystem 2011. Zambia Wildlife Authority, Chilanga.
Zambia	Kafue	Kafue GMAs	2011	1435	781	Frederick. 2011. Aerial Survey: Kafue Ecosystem 2011. Zambia Wildlife Authority, Chilanga.
Zambia	Kafue	Kafue GMAs	2015	1876	819.315	GEC report
Zambia	Kafue	Kafue NP	2002	2197	660.714	historical data cited in GEC report
Zambia	Kafue	Kafue NP	2006	2506	618.367	historical data cited in GEC report
Zambia	Kafue	Kafue NP	2011	2280	492.857	historical data cited in GEC report
Zambia	Kafue	Kafue NP	2015	4813	1148.69	GEC report
Zambia	Lower Zambezi	Lower Zambezi	2003	1347		historical data cited in GEC report
Zambia	Lower Zambezi	Lower Zambezi	2005	3417		historical data cited in GEC report
Zambia	Lower Zambezi	Lower Zambezi	2013	1795		historical data cited in GEC report
Zambia	Lower Zambezi	Lower Zambezi	2015	973	295.289	GEC report
Zambia	Luangwa	Luangwa North NP	1996	3033	1148.98	African Elephant Database
Zambia	Luangwa	Luangwa North NP	2001	3750	538	African Elephant Database
Zambia	Luangwa	Luangwa North NP	2003	3235	355	African Elephant Database
Zambia	Luangwa	Luangwa North NP	2007	3487	752	African Elephant Database
Zambia	Luangwa	Luangwa North NP	2009	3749	525	WCS Flight Programme. 2009. Aerial Survey Report: Luangwa Valley 2009. Wildlife Conservation Society, New York.
Zambia	Luangwa	Luangwa North NP	2011	3460	848	African Elephant Database
Zambia	Luangwa	Luangwa North NP	2012	2214	371	African Elephant Database
Zambia	Luangwa	Luangwa North NP	2015	4673	903.292	GEC report
Zambia	Luangwa	Luangwa South NP	1996	7942	1494.9	African Elephant Database
Zambia	Luangwa	Luangwa South NP	2002	4459	775	African Elephant Database
Zambia	Luangwa	Luangwa South NP	2009	4419	899	WCS Flight Programme. 2009. Aerial Survey Report: Luangwa Valley 2009. Wildlife Conservation Society, New York.
Zambia	Luangwa	Luangwa South NP	2011	3855	597	African Elephant Database
Zambia	Luangwa	Luangwa South NP	2012	2813	489	African Elephant Database
Zambia	Luangwa	Luangwa South NP	2015	3302	604.944	GEC report
Zambia	Luangwa	rest of ecosystem	2009	9003	916.584	WCS Flight Programme. 2009. Aerial Survey Report: Luangwa Valley 2009. Wildlife Conservation Society, New York.
Zambia	Luangwa	rest of ecosystem	2012	2834	668.007	African Elephant Database
Zambia	Luangwa	rest of ecosystem	2015	5923	1574.95	GEC report
Zambia	West Zambezi	Sioma Ngwezi NP	2004	899		historical data cited in GEC report
Zambia	West Zambezi	Sioma Ngwezi NP	2005	385	189.286	historical data cited in GEC report
Zambia	West Zambezi	Sioma Ngwezi NP	2013	133	72.5465	historical data cited in GEC report
Zambia	West Zambezi	Sioma Ngwezi NP	2015	48	38.3614	GEC report
Zimbabwe	Gonarezhou NP & Save Valley Conservancy	Gonarezhou NP	1995	4154	778.153	historical data cited in GEC report
Zimbabwe	Gonarezhou NP & Save Valley Conservancy	Gonarezhou NP	1996	3741	880.928	African Elephant Database
Zimbabwe	Gonarezhou NP & Save Valley Conservancy	Gonarezhou NP	1998	4151	579.944	historical data cited in GEC report
Zimbabwe	Gonarezhou NP & Save Valley Conservancy	Gonarezhou NP	2001	4987	792.835	historical data cited in GEC report
Zimbabwe	Gonarezhou NP & Save Valley Conservancy	Gonarezhou NP	2007	6516	880.928	Dunham et al.. 2007. Aerial survey of elephants and other large herbivores in Gonarezhou National Park, Zimbabwe: 2007. WWF-SARPO.
Zimbabwe	Gonarezhou NP & Save Valley Conservancy	Gonarezhou NP	2009	9123	887.383	Dunham et al.. 2009. Aerial survey of elephants and other large herbivores in Gonarezhou National Park (Zimbabwe), Zinave National Park (Mozambiqu) and surrounds: 2009. Frankfurt Zoological Society.
Zimbabwe	Gonarezhou NP & Save Valley Conservancy	Gonarezhou NP	2013	10151	965.037	Dunham. 2013. Aerial survey of elephants and other large herbivores in Gonarezhou National Park (Zimbabwe) and surrounding areas: 2013. Frankfurt Zoological Society.
Zimbabwe	Gonarezhou NP & Save Valley Conservancy	Gonarezhou NP	2014	11120	1382.03	GEC report
Zimbabwe	Gonarezhou NP & Save Valley Conservancy	Save Valley Conservancy	2001	535	161	historical data cited in GEC report
Zimbabwe	Gonarezhou NP & Save Valley Conservancy	Save Valley Conservancy	2014	1585	661	GEC report
Zimbabwe	NW Matabeleland	Hwange NP	1995	22811	2093.89	historical data cited in GEC report
Zimbabwe	NW Matabeleland	Hwange NP	1996	27972	3374.72	historical data cited in GEC report
Zimbabwe	NW Matabeleland	Hwange NP	1997	31819	3467.11	historical data cited in GEC report
Zimbabwe	NW Matabeleland	Hwange NP	1998	28928	2448.01	historical data cited in GEC report
Zimbabwe	NW Matabeleland	Hwange NP	1999	34369	2852.23	historical data cited in GEC report
Zimbabwe	NW Matabeleland	Hwange NP	2001	44492	2914.23	historical data cited in GEC report
Zimbabwe	NW Matabeleland	Hwange NP	2014	45846	3185.73	GEC report
Zimbabwe	NW Matabeleland	Matetsi Complex	1995	4414	984.193	historical data cited in GEC report
Zimbabwe	NW Matabeleland	Matetsi Complex	1996	5249	1246.73	historical data cited in GEC report
Zimbabwe	NW Matabeleland	Matetsi Complex	1997	4043	995.6	historical data cited in GEC report
Zimbabwe	NW Matabeleland	Matetsi Complex	1998	5432	1170.58	historical data cited in GEC report
Zimbabwe	NW Matabeleland	Matetsi Complex	1999	8582	1720.93	historical data cited in GEC report
Zimbabwe	NW Matabeleland	Matetsi Complex	2001	4201	867.507	historical data cited in GEC report
Zimbabwe	NW Matabeleland	Matetsi Complex	2014	4843	1514.38	GEC report
Zimbabwe	Sebungwe	communal lands	1995	4964	811.077	historical data cited in GEC report
Zimbabwe	Sebungwe	communal lands	1996	4016	474.86	historical data cited in GEC report
Zimbabwe	Sebungwe	communal lands	1997	4362	358.93	historical data cited in GEC report
Zimbabwe	Sebungwe	communal lands	1999	4921	740.333	historical data cited in GEC report
Zimbabwe	Sebungwe	communal lands	2001	4037	560.393	historical data cited in GEC report
Zimbabwe	Sebungwe	communal lands	2006	4361	562.63	historical data cited in GEC report
Zimbabwe	Sebungwe	communal lands	2014	497	203.544	GEC report
Zimbabwe	Sebungwe	Parks & Wildlife estate	1995	6753	591.05	historical data cited in GEC report
Zimbabwe	Sebungwe	Parks & Wildlife estate	1996	9030	799.603	historical data cited in GEC report
Zimbabwe	Sebungwe	Parks & Wildlife estate	1997	9056	513.52	historical data cited in GEC report
Zimbabwe	Sebungwe	Parks & Wildlife estate	1999	10897	1012.73	historical data cited in GEC report
Zimbabwe	Sebungwe	Parks & Wildlife estate	2001	9944	928.515	historical data cited in GEC report
Zimbabwe	Sebungwe	Parks & Wildlife estate	2006	10229	907.115	historical data cited in GEC report
Zimbabwe	Sebungwe	Parks & Wildlife estate	2014	2894	574.983	GEC report
Zimbabwe	Tuli	Nottingham & Sentinel	2000	170	0	historical data cited in GEC report
Zimbabwe	Tuli	Nottingham & Sentinel	2001	104	0	historical data cited in GEC report
Zimbabwe	Tuli	Nottingham & Sentinel	2004	20	0	historical data cited in GEC report
Zimbabwe	Tuli	Nottingham & Sentinel	2007	116	0	historical data cited in GEC report
Zimbabwe	Tuli	Nottingham & Sentinel	2010	304	0	historical data cited in GEC report
Zimbabwe	Tuli	Nottingham & Sentinel	2012	355	0	historical data cited in GEC report
Zimbabwe	Tuli	Nottingham & Sentinel	2014	154	0	GEC report
Zimbabwe	Tuli	Tuli SA	2000	57	0	historical data cited in GEC report
Zimbabwe	Tuli	Tuli SA	2001	0	0	historical data cited in GEC report
Zimbabwe	Tuli	Tuli SA	2004	0	0	historical data cited in GEC report
Zimbabwe	Tuli	Tuli SA	2007	3	0	historical data cited in GEC report
Zimbabwe	Tuli	Tuli SA	2008	0	0	historical data cited in GEC report
Zimbabwe	Tuli	Tuli SA	2010	0	0	historical data cited in GEC report
Zimbabwe	Tuli	Tuli SA	2012	0	0	historical data cited in GEC report
Zimbabwe	Tuli	Tuli SA	2014	58	0	GEC report
Zimbabwe	Zambezi Valley	Zambezi Valley	1998	17464	1512.47	historical data cited in GEC report
Zimbabwe	Zambezi Valley	Zambezi Valley	2001	19341	1263.95	historical data cited in GEC report
Zimbabwe	Zambezi Valley	Zambezi Valley	2014	11657	1136.98	GEC report

## Sheet: Explanation of "Data"
Column	Detailed description, if necessary
Country
Ecosystem	Ecosystem names are as used in the manuscript and supplemental material.
Stratum	Where the stratum name is the same as the ecosystem name, this indicates that the entire ecosytsem was the study area for the historical data. See Figure S7 for map of strata.
Year	Year of survey
Estimate	Estimated number of elephants present
SE	0 values indicate total counts; blank indicates missing value for a sample count.
Source	Source of data. "GEC report" indicates that data were taken from the GEC report for that ecosystem; most GEC reports are not publicly available.

## Sheet: List of strata
Country	Ecosystem	Stratum	Area (km2)
Angola	Southeast Angola	Southeast Angola	6613.33
Botswana	Northern Botswana	Central district	13954.6
Botswana	Northern Botswana	Chobe district	19765
Botswana	Northern Botswana	Ngamiland	37108.5
Botswana	Tuli	farms	577.19
Botswana	Tuli	Northern Tuli GR	1025.95
Cameroon	N. Soudanian Savannahs	N. Soudianian Savannahs	20603
Chad	Binder Lere R	Binder Lere R	2116.73
Chad	Zakouma NP	Zakouma NP	3150.62
DR Congo	Garamba NP	Garamba NP	8077.52
DR Congo	Greater Virunga Landscape	Virunga NP	4804.87
Kenya	Laikipia-Samburu	Laikipia-Samburu	17653.8
Kenya	Masai Mara	Masai Mara R	1489.83
Kenya	Masai Mara	unprotected areas	7188.1
Kenya	Tsavo-Amboseli	Tsavo East NP north	9252.34
Kenya	Tsavo-Amboseli	Tsavo East NP south	4235.33
Kenya	Tsavo-Amboseli	Tsavo West NP	6990.87
Malawi	Kasungu NP	Kasungu NP	2459.42
Malawi	Liwonde NP	Liwonde NP	545.91
Mali	Gourma	Gourma	15136.2
Mozambique	Limpopo NP	Limpopo NP	11974.6
Mozambique	Marromeo Buffalo R	Marromeo Buffalo R	2303.11
Mozambique	Niassa NR	Niassa NR	42126.3
Mozambique	Quirimbas NP	Quirimbas NP	11303.5
Mozambique	Tete Province / Magoe	east of Musengezi	14509.1
Mozambique	Tete Province / Magoe	west of Musengezi	2717.7
South Africa	Kruger NP	Kruger NP	19177.7
South Africa	Tuli	Mapungubwe NP	152.27
Tanzania	Burigi-Biharamulo	Burigi-Biharamulo	4663.93
Tanzania	Katavi-Rukwa	Katavi-Rukwa	22486.9
Tanzania	Malagarasi-Muyovosi	Malagarasi-Muyovosi	45083.6
Tanzania	Ruaha-Rungwa	Ruaha-Rungwa	50819.1
Tanzania	Selous-Mikumi	Selous-Mikumi	104479
Tanzania	Serengeti	Serengeti	23633.3
Tanzania	Tarangire-Manyara	Tarangire-Manyara	14951.7
Uganda	Greater Virunga Landscape	Queen Elizabeth NP	1572.61
Uganda	Kidepo Valley NP & Karenga CWA	Kidepo Valley NP	1430.88
Uganda	Murchison Falls Protected Area	Murchison Falls PA	6270.79
W. Africa	WAP	WAP	26357.2
Zambia	Kafue	Kafue GMAs	22857.3
Zambia	Kafue	Kafue NP	22317.8
Zambia	Lower Zambezi	Lower Zambezi	2536.24
Zambia	Luangwa	Luangwa North NP	4678.16
Zambia	Luangwa	Luangwa South NP	8647.34
Zambia	Luangwa	rest of ecosystem	19556.8
Zambia	West Zambezi	Sioma Ngwezi NP	4478.38
Zimbabwe	Gonarezhou NP & Save Valley Conservancy	Gonarezhou NP	5341.1
Zimbabwe	Gonarezhou NP & Save Valley Conservancy	Save Valley Conservancy	3498.46
Zimbabwe	NW Matabeleland	Hwange NP	14873.8
Zimbabwe	NW Matabeleland	Matetsi Complex	4385.32
Zimbabwe	Sebungwe	communal lands	9293.08
Zimbabwe	Sebungwe	Parks & Wildlife estate	6237.49
Zimbabwe	Tuli	Nottingham & Sentinel	771.3
Zimbabwe	Tuli	Tuli SA	425.89
Zimbabwe	Zambezi Valley	Zambezi Valley	16995.6
