# Supplementary material for: Continent-wide survey reveals massive decline in African savannah elephants
Source: PeerJ journal article supplement (doi:10.7717/peerj.2354), 2016-08-31

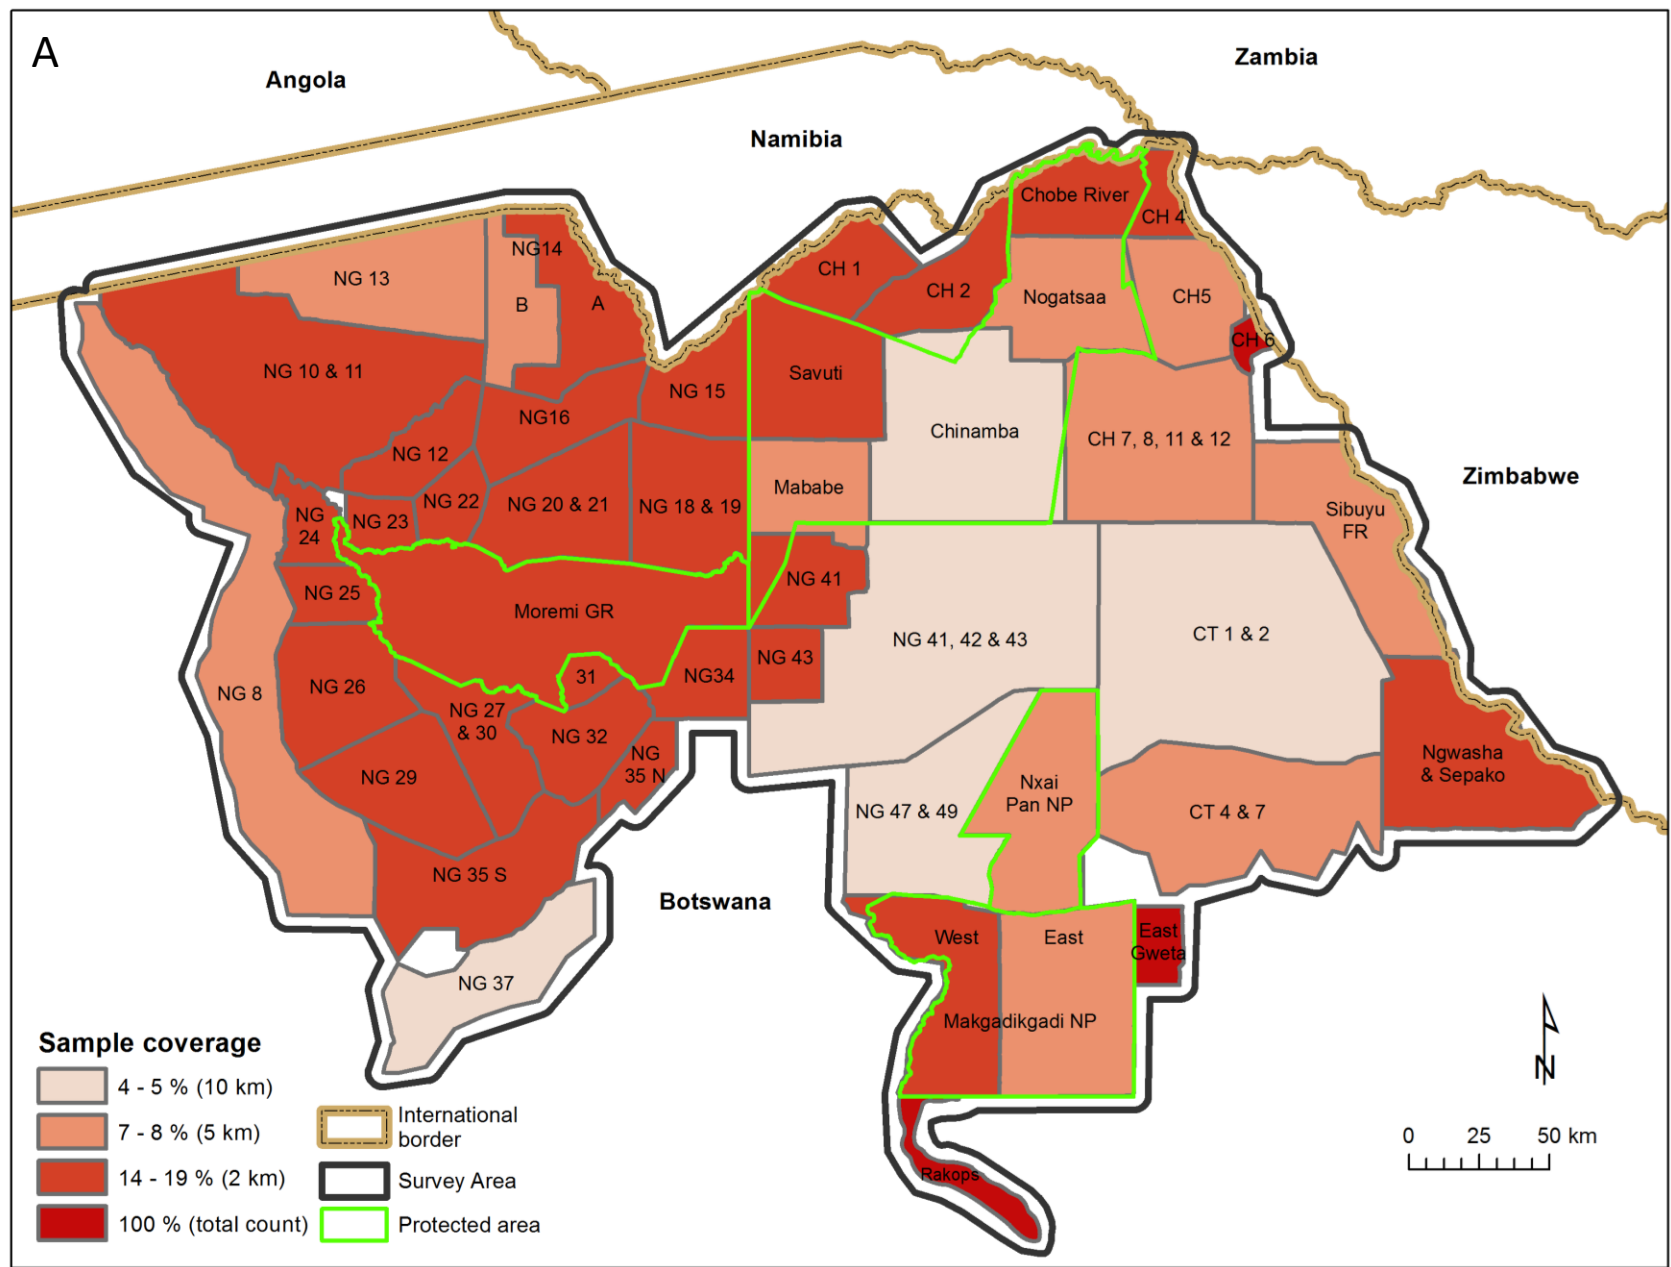

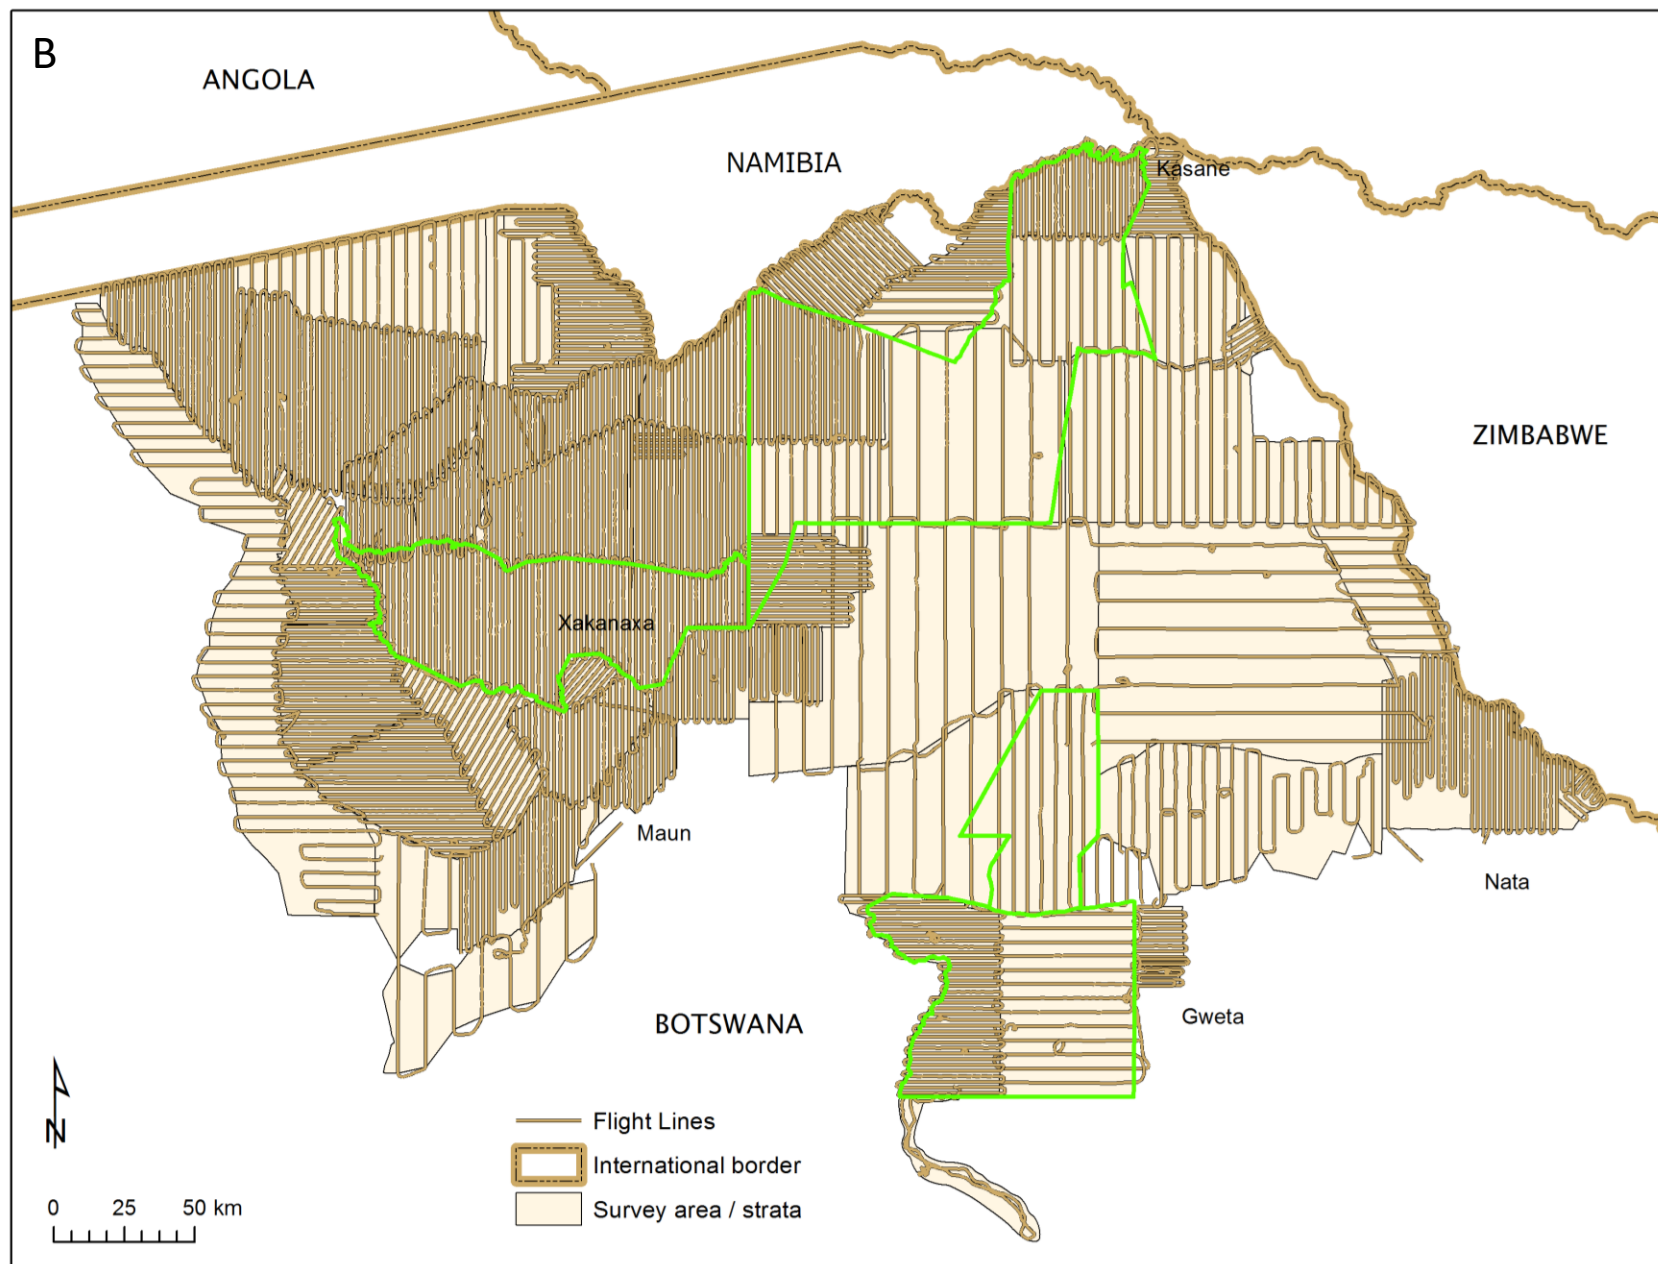

Supplement: Figure_S2.pdf [file Figure_S2.pdf]
