# Supplementary material for: Continent-wide survey reveals massive decline in African savannah elephants
Source: PubMed Central journal article supplement (PMC5012305; doi:10.7717/peerj.2354), 2016-08-31
Supplement: peerj-04-2354-s008.pdf [file peerj-04-2354-s008.pdf]

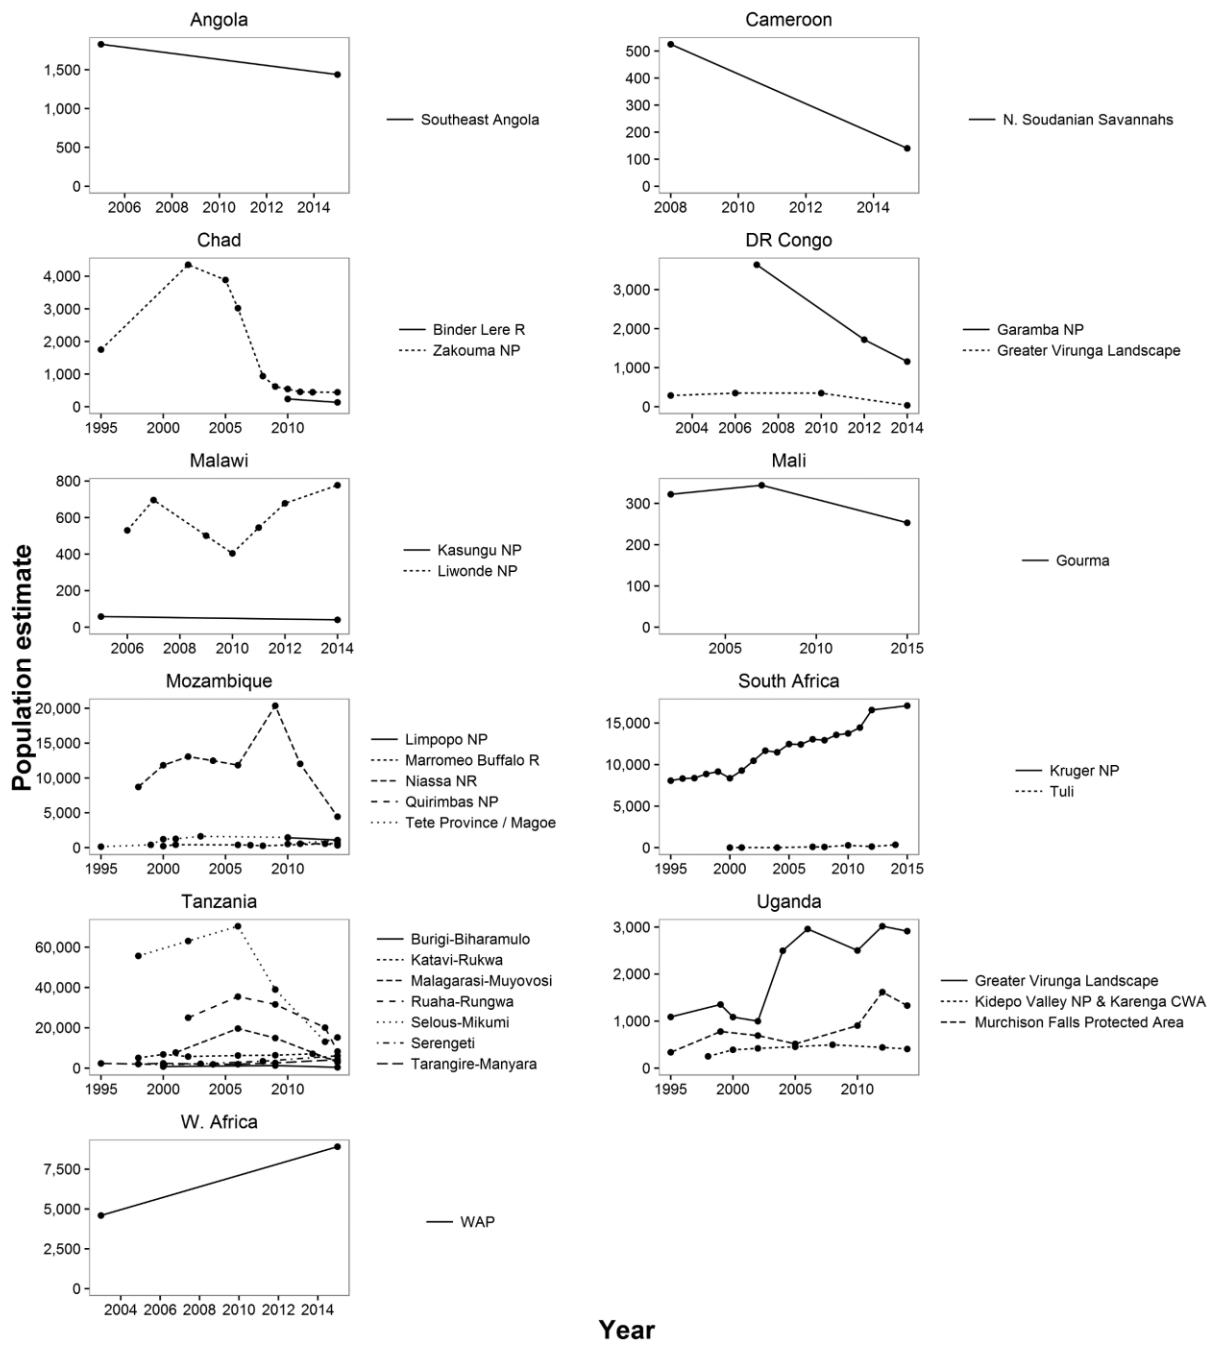

Year

Northern Botswana, Botswana

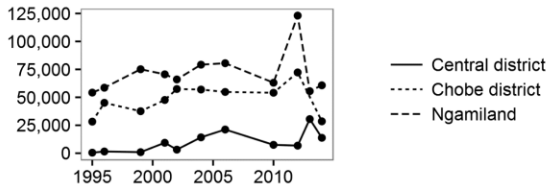

Tuli, Botswana

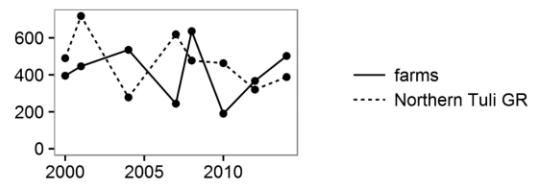

Laikipia-Samburu, Kenya

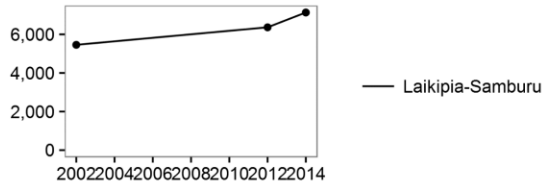

Masai Mara, Kenya

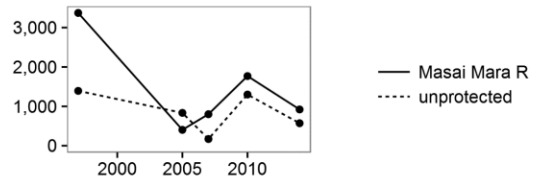

Tsavo-Amboseli, Kenya

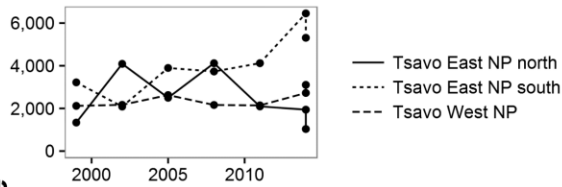

Kafue, Zambia

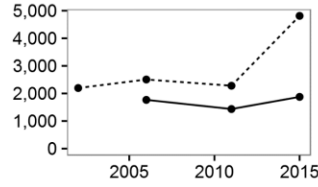

Population estimate

Lower Zambezi, Zambia

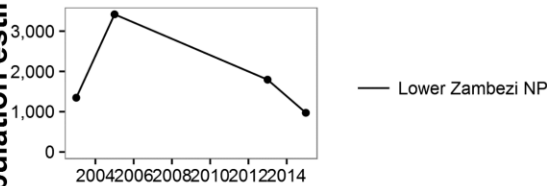

Luangwa, Zambia

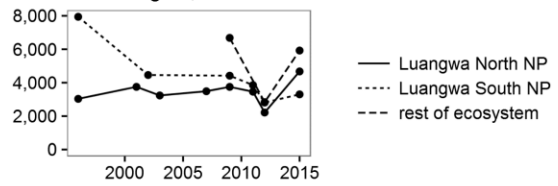

West Zambezi, Zambia

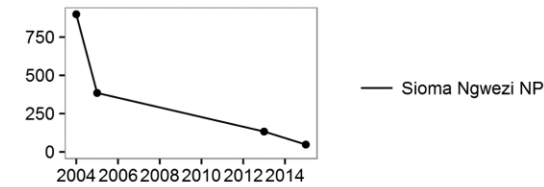

Gonarezhou NP, Zimbabwe

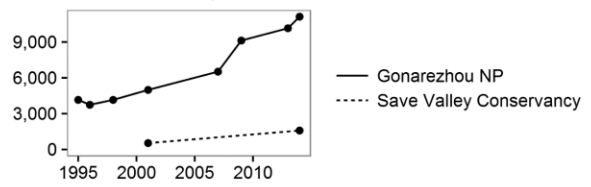

NW Matabeleland, Zimbabwe

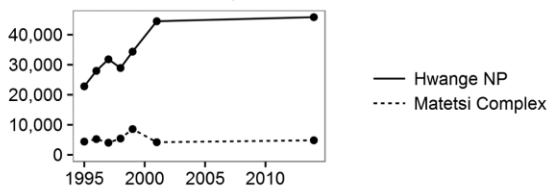

Sebungwe, Zimbabwe

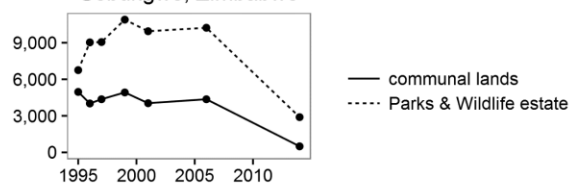

Tuli, Zimbabwe

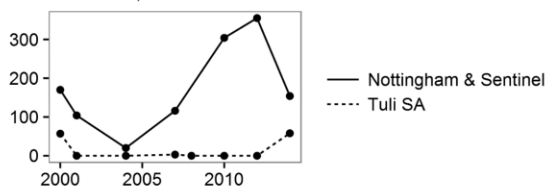

Zambezi Valley, Zimbabwe

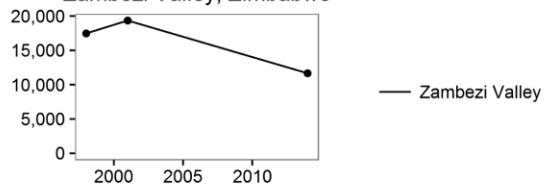

Year
